# Supplementary material
Source: PubMed Central journal article supplement (PMC10125343)
Supplement: bg2c00057_si_001.pdf [file bg2c00057_si_001.pdf]

## Supplementary Information

### **Synthesis and Antagonist Activity of Methyllaconitine Analogues on Human $\alpha 7$ Nicotinic Acetylcholine Receptors**

Ashraf M. A. Qasem, Michael G. Rowan, Victoria R. Sanders,<sup>a</sup> Neil S. Millar,<sup>a</sup> and Ian S. Blagbrough\*

School of Pharmacy, University of Bath, Bath BA2 7AY, U.K.

<sup>a</sup> Department of Neuroscience, Physiology and Pharmacology, University College London, Gower Street, London WC1E 6BT, U.K.

\*Corresponding Author: tel.: 1225-386795; Email: prsisb@bath.ac.uk

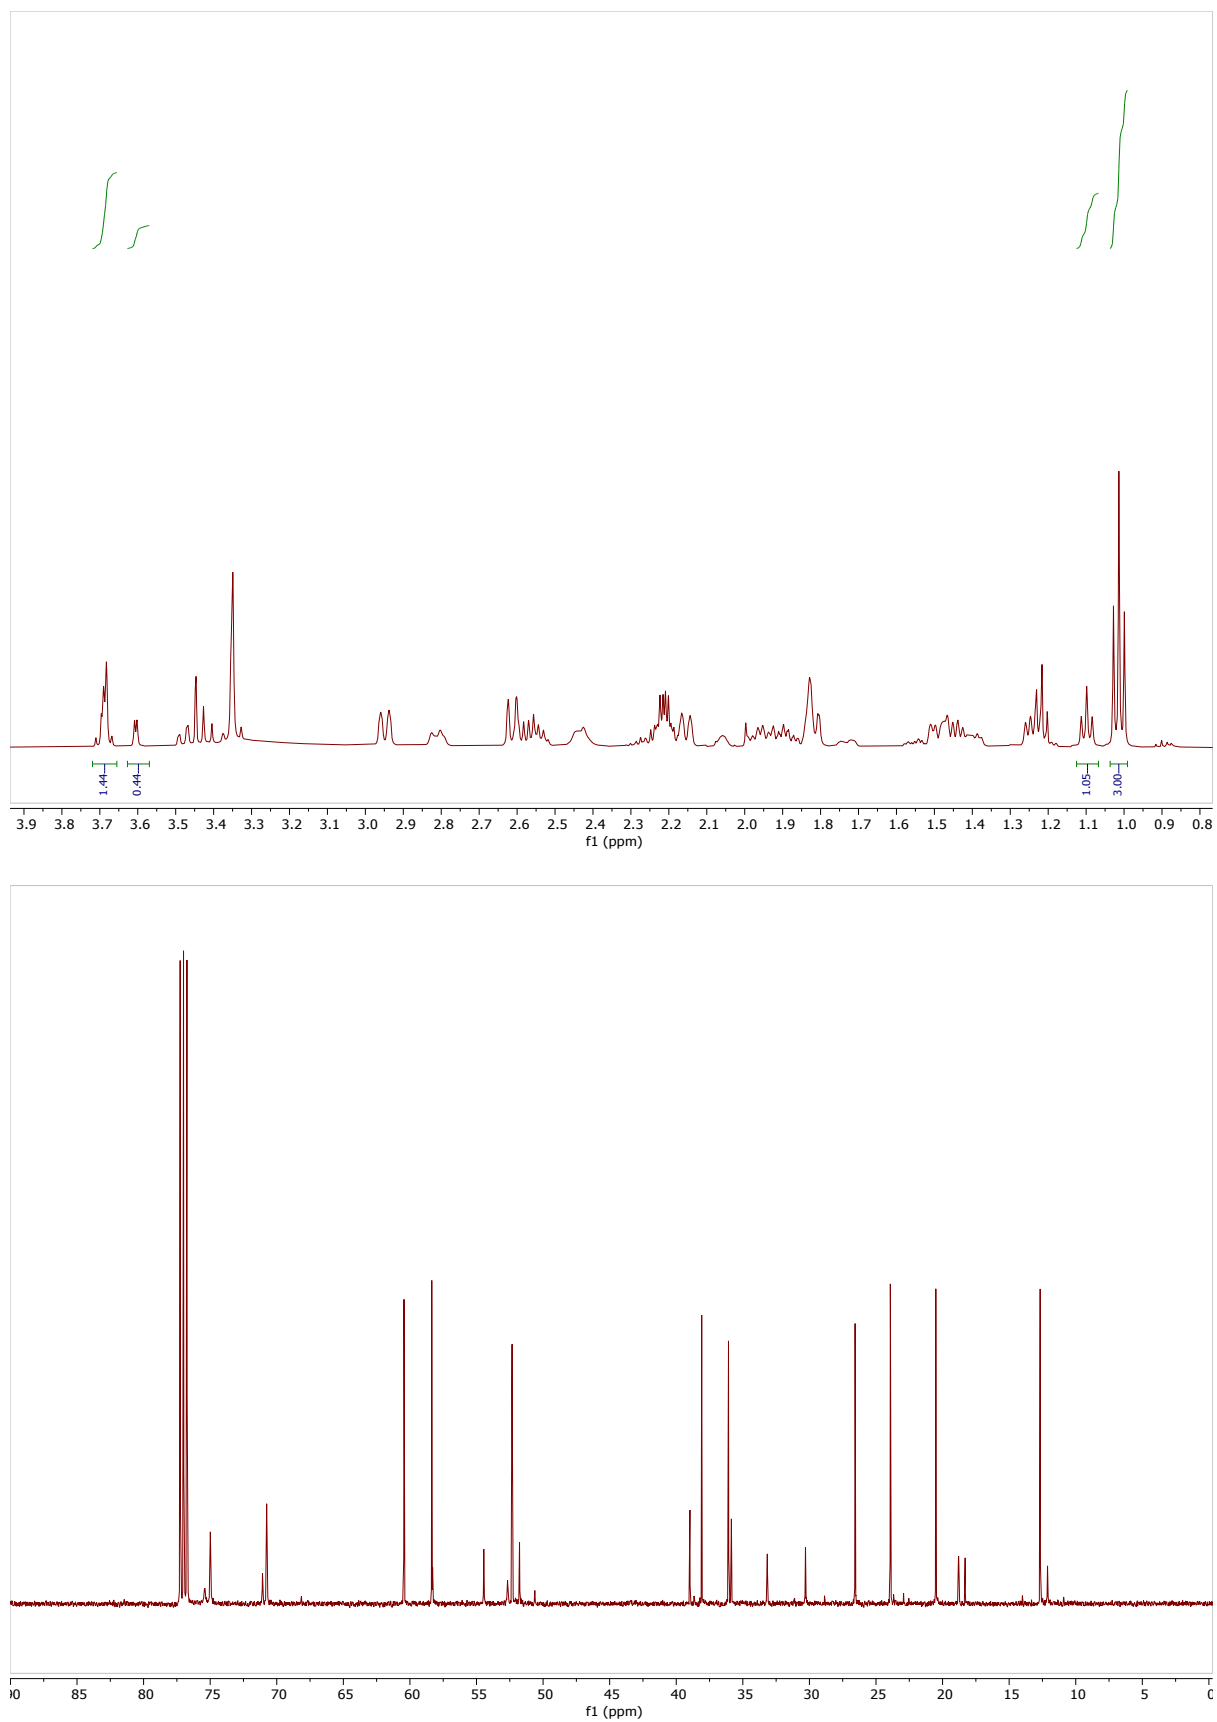

**Figure S1.** The  $^1\text{H}$  NMR (500 MHz) (upper) and  $^{13}\text{C}$  NMR (125 MHz) (lower) in  $\text{CDCl}_3$  of the epimeric mixture after reduction of the cyclohexanone in AE-bicycle **4**.

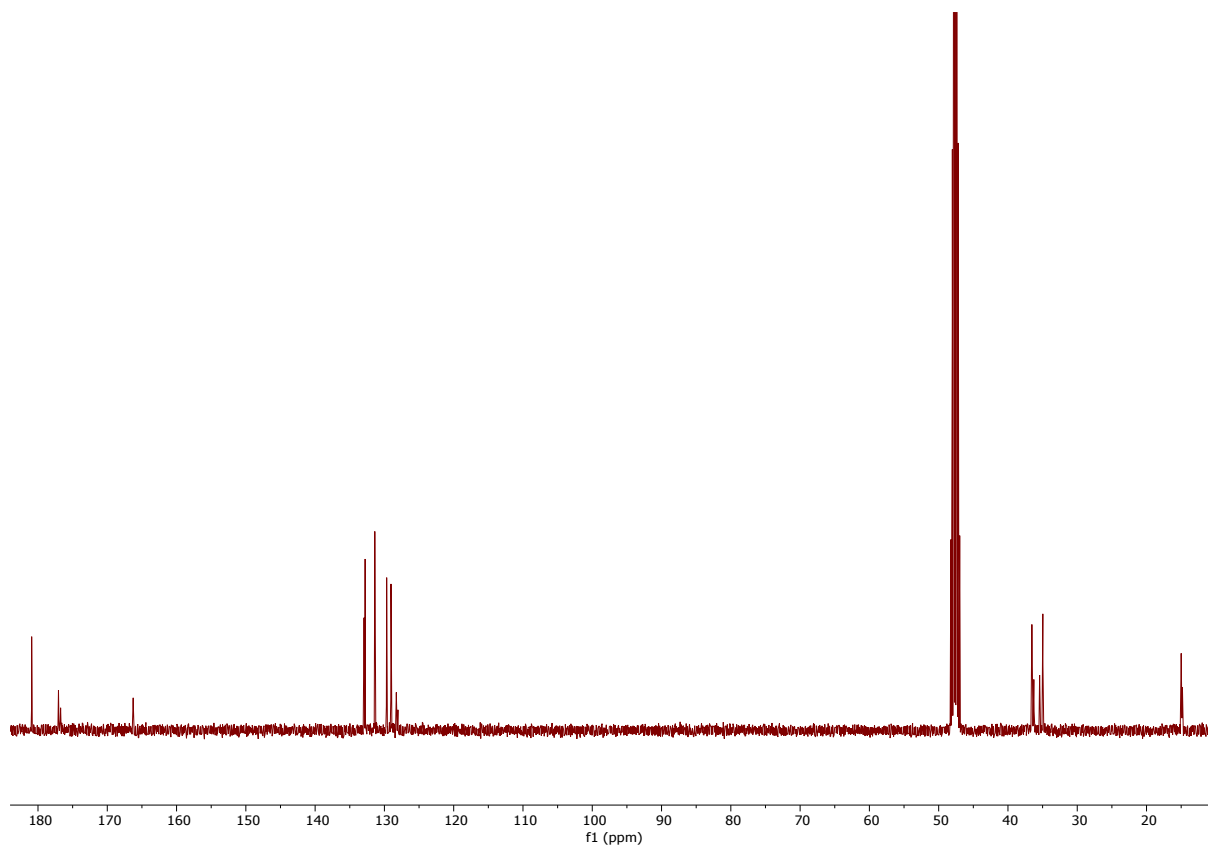

**Figure S2.**  $^{13}\text{C}$  NMR (125 MHz) in  $\text{CD}_3\text{OD}$  of **13** at 25 °C (298 K).

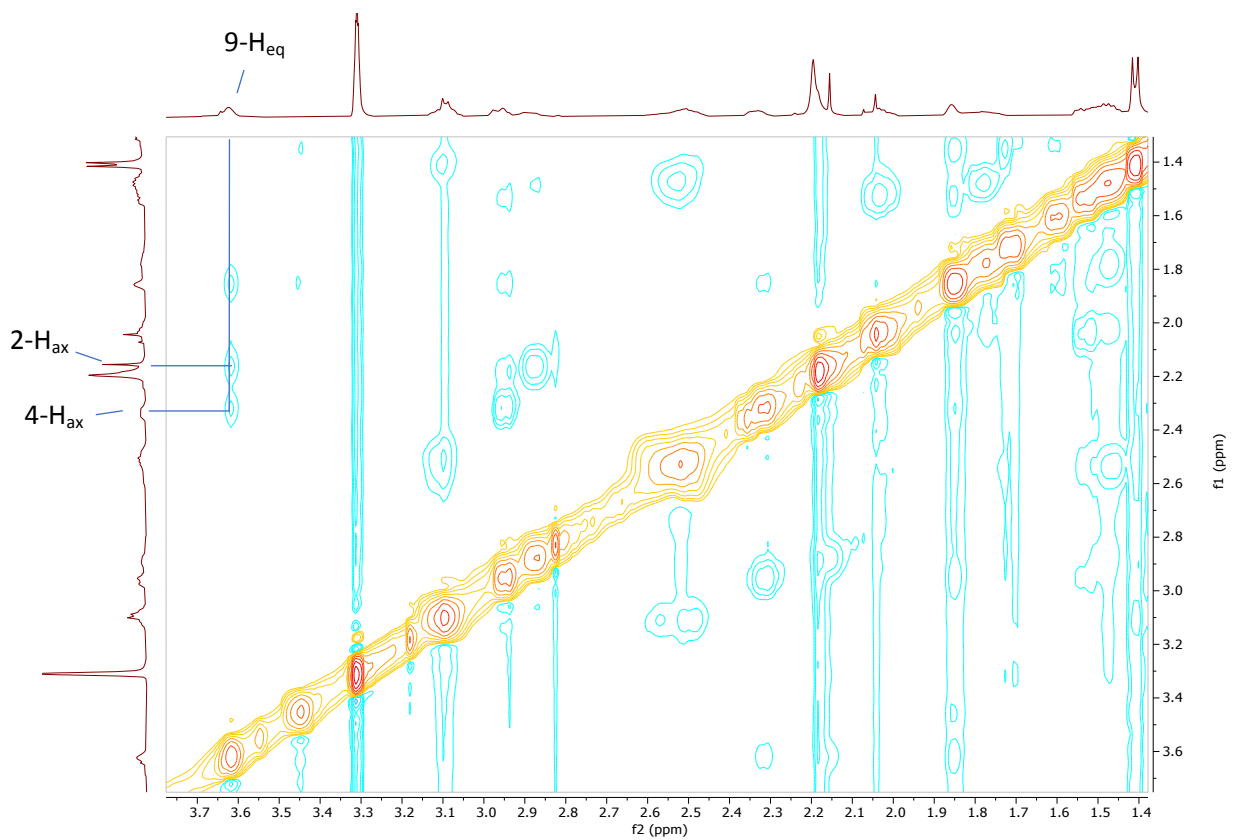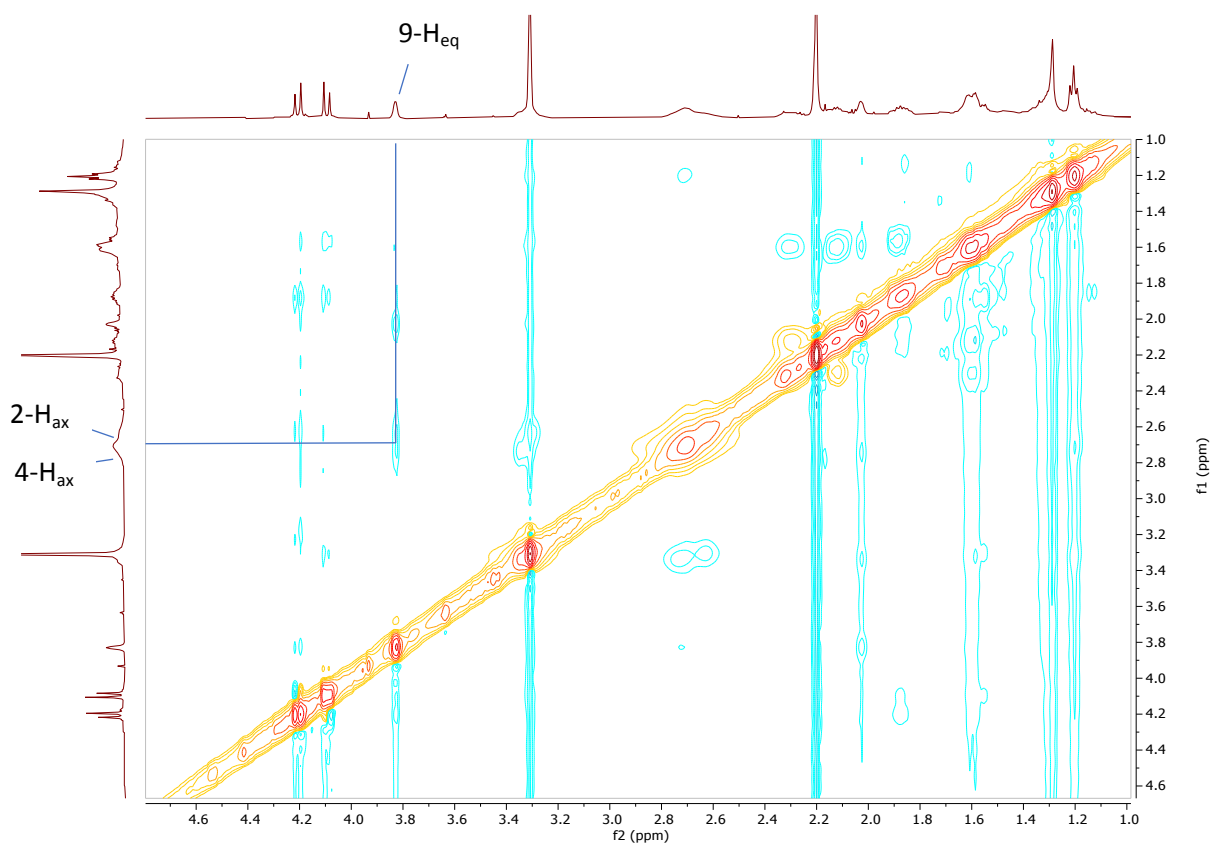

**Figure S3.** NOESY correlation between 9- $H_{eq}$  and 2- $H_{ax}$ , 4- $H_{ax}$  in analogues **14** (upper) and **21** (lower).

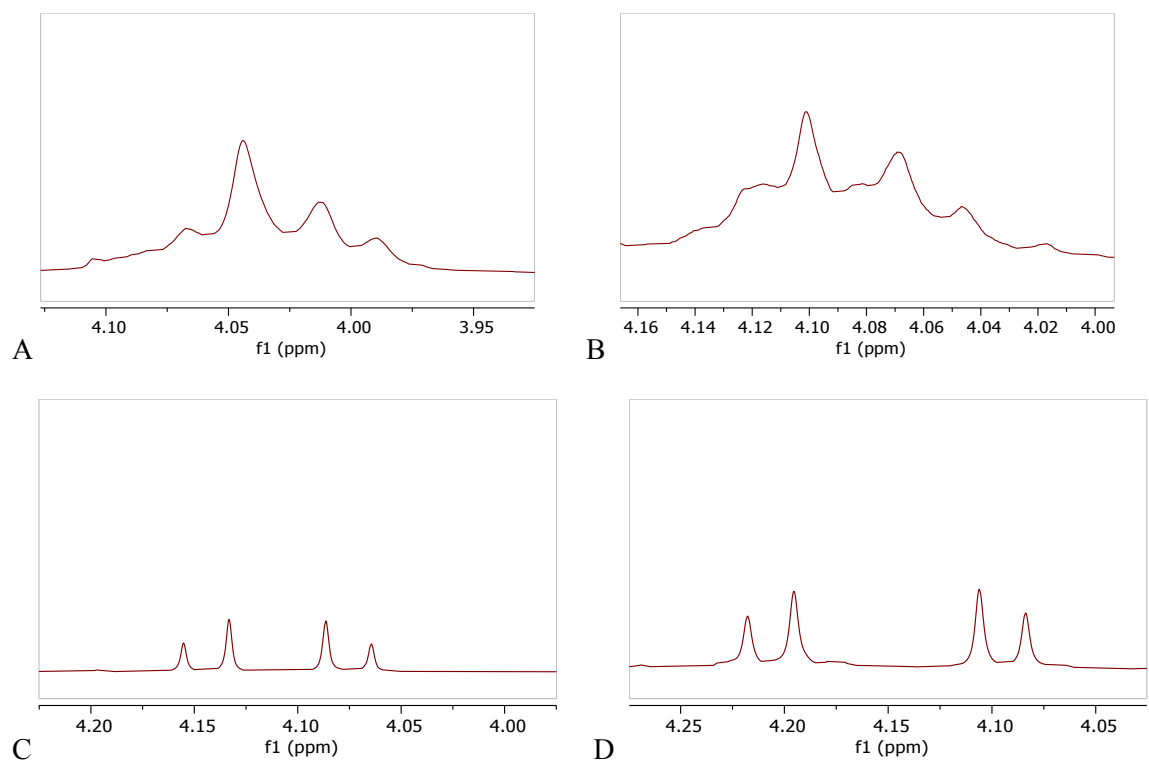

**Figure S4.**  $^1\text{H}$  NMR signal at position 1' in analogues **14** and **15** (A and B respectively) and **20** and **21** (C and D respectively).

#### HPLC purity assays of analogues 14-21

((9*R*)-9-Hydroxy-3-methyl-3-azabicyclo[3.3.1]nonan-1-yl)methyl 2-((*S*)-3-methyl-2,5-dioxopyrrolidin-1-yl)benzoate (**14**)

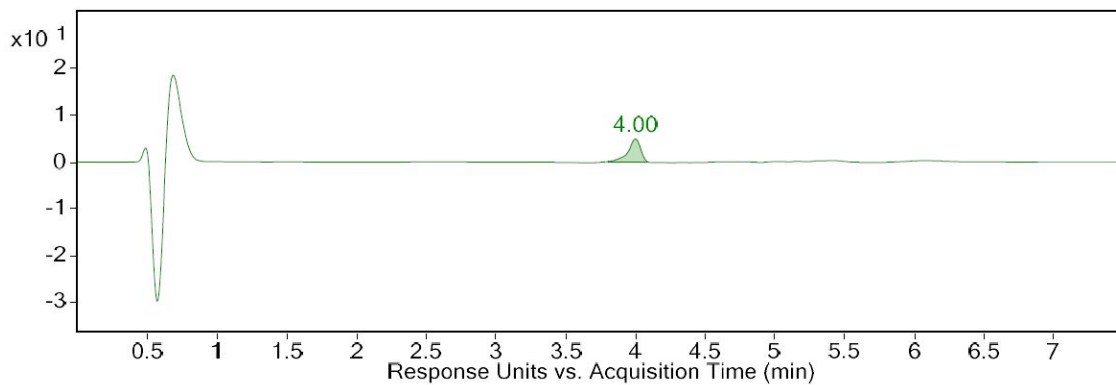

**Integration Peak List**

| Peak | Start | RT | End  | Height | Area  | Area % |
|------|-------|----|------|--------|-------|--------|
| 1    | 3.8   | 4  | 4.09 | 4.9    | 30.48 | 100    |

((9*R*)-3-Ethyl-9-hydroxy-3-azabicyclo[3.3.1]nonan-1-yl)methyl 2-((*S*)-3-methyl-2,5-dioxopyrrolidin-1-yl)benzoate (**15**)

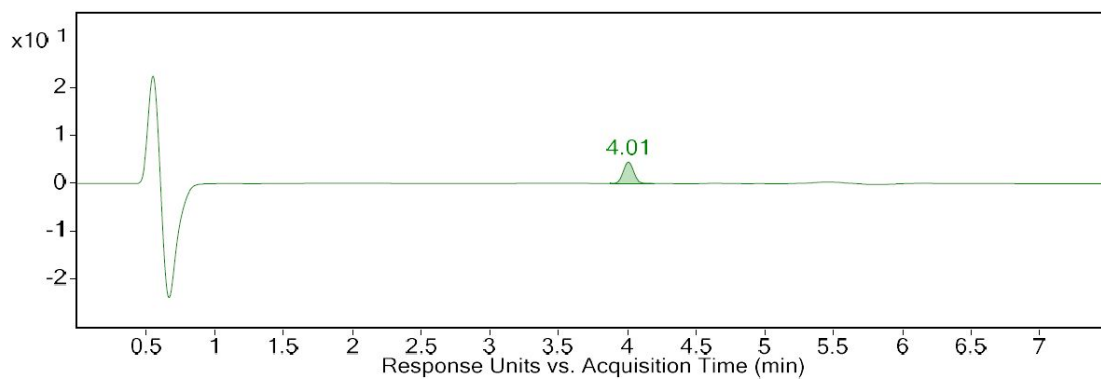

**Integration Peak List**

| Peak | Start | RT   | End  | Height | Area  | Area % |
|------|-------|------|------|--------|-------|--------|
| 1    | 3.88  | 4.01 | 4.19 | 4.45   | 23.58 | 100    |

((9*R*)-3-Benzyl-9-hydroxy-3-azabicyclo[3.3.1]nonan-1-yl)methyl 2-((*S*)-3-methyl-2,5-dioxopyrrolidin-1-yl)benzoate (**16**)

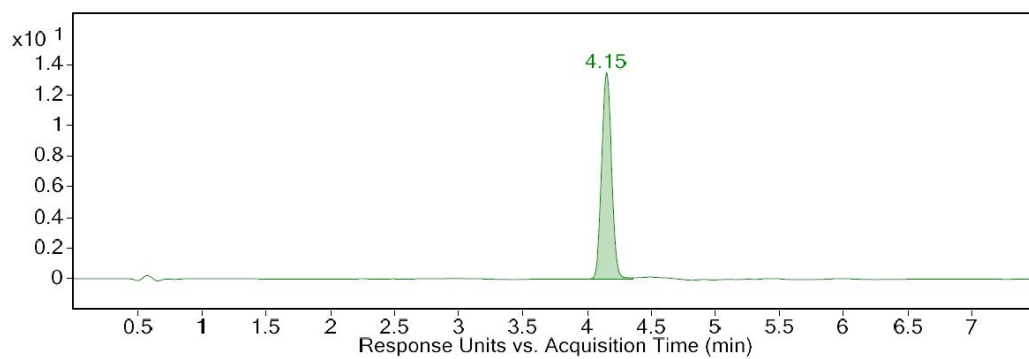

Integration Peak List

| Peak | Start | RT   | End  | Height | Area  | Area % |
|------|-------|------|------|--------|-------|--------|
| 1    | 4.02  | 4.15 | 4.36 | 13.53  | 72.99 | 100    |

((9*R*)-9-Hydroxy-3-(2-phenethyl)-3-azabicyclo[3.3.1]nonan-1-yl)methyl 2-((*S*)-3-methyl-2,5-dioxopyrrolidin-1-yl)benzoate (**17**)

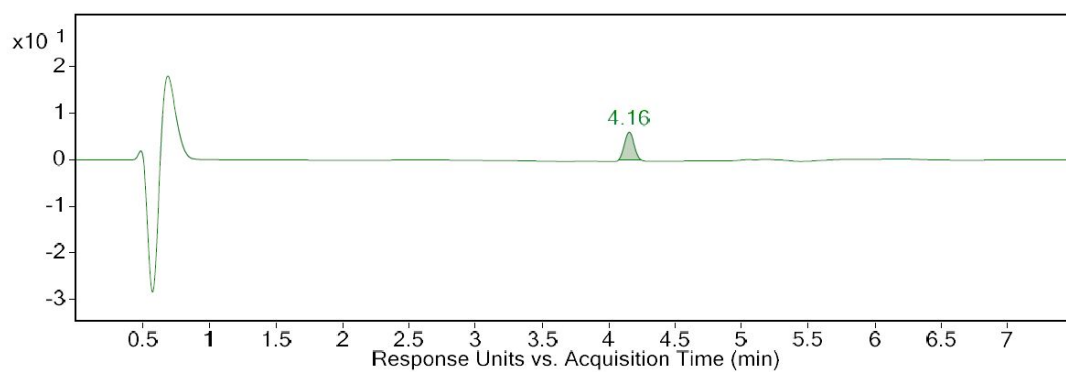

Integration Peak List

| Peak | Start | RT   | End  | Height | Area  | Area % |
|------|-------|------|------|--------|-------|--------|
| 1    | 4.07  | 4.16 | 4.25 | 6.03   | 29.88 | 100    |

((9*R*)-9-Hydroxy-3-(3-phenylpropyl)-3-azabicyclo[3.3.1]nonan-1-yl)methyl 2-((*S*)-3-methyl-2,5-dioxopyrrolidin-1-yl)benzoate (**18**)

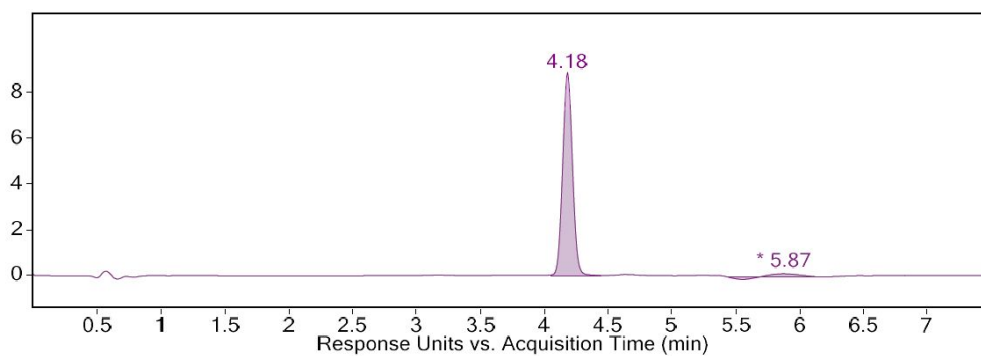

Integration Peak List

| Peak | Start | RT   | End  | Height | Area  | Area % |
|------|-------|------|------|--------|-------|--------|
| 1    | 4.05  | 4.18 | 4.44 | 8.92   | 47.68 | 100    |
| 2    | 5.43  | 5.87 | 6.17 | 0.14   | 1.17  | 2.46   |

((9*R*)-9-Hydroxy-3-(4-phenylbutyl)-3-azabicyclo[3.3.1]nonan-1-yl)methyl 2-((*S*)-3-methyl-2,5-dioxopyrrolidin-1-yl)benzoate (**19**)

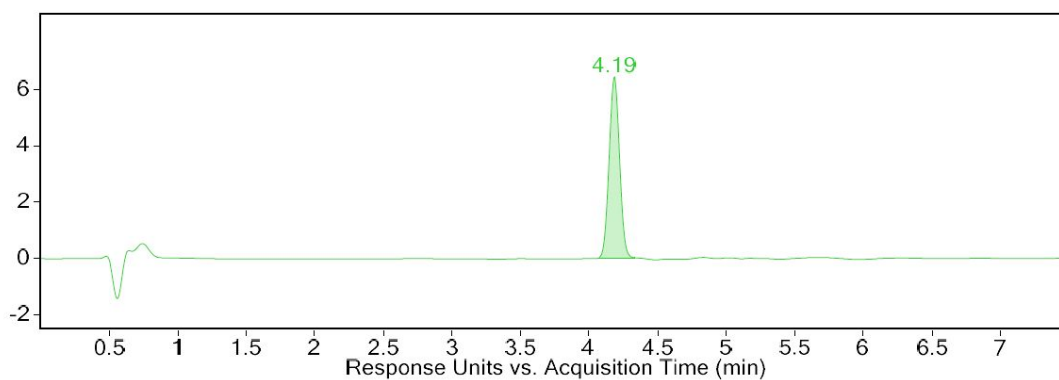

Integration Peak List

| Peak | Start | RT   | End  | Height | Area | Area % |
|------|-------|------|------|--------|------|--------|
| 1    | 4.07  | 4.19 | 4.33 | 6.45   | 34.2 | 100    |

((9*R*)-9-Hydroxy-3-methyl-3-azabicyclo[3.3.1]nonan-1-yl)methyl 2-acetamidobenzoate (**20**)



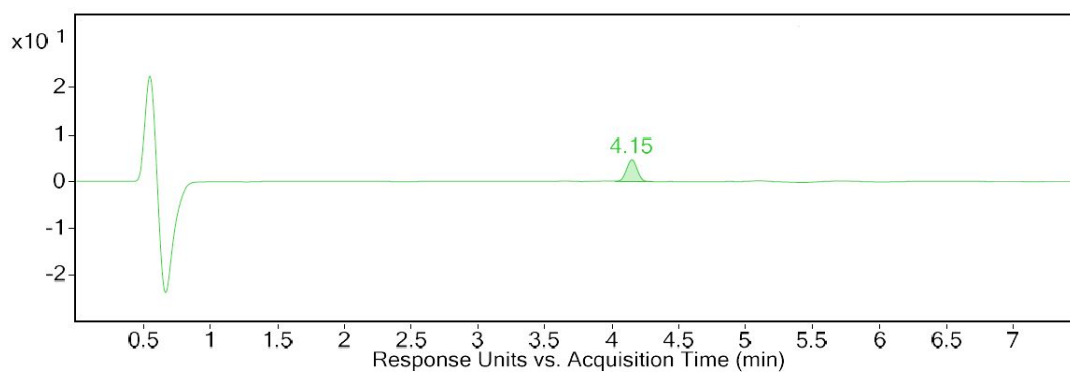

**Integration Peak List**

| Peak | Start | RT   | End | Height | Area  | Area % |
|------|-------|------|-----|--------|-------|--------|
| 1    | 4.02  | 4.15 | 4.3 | 4.63   | 25.58 | 100    |

((9*R*)-3-Ethyl-9-hydroxy-3-azabicyclo[3.3.1]nonan-1-yl)methyl 2-acetamidobenzoate (**21**)

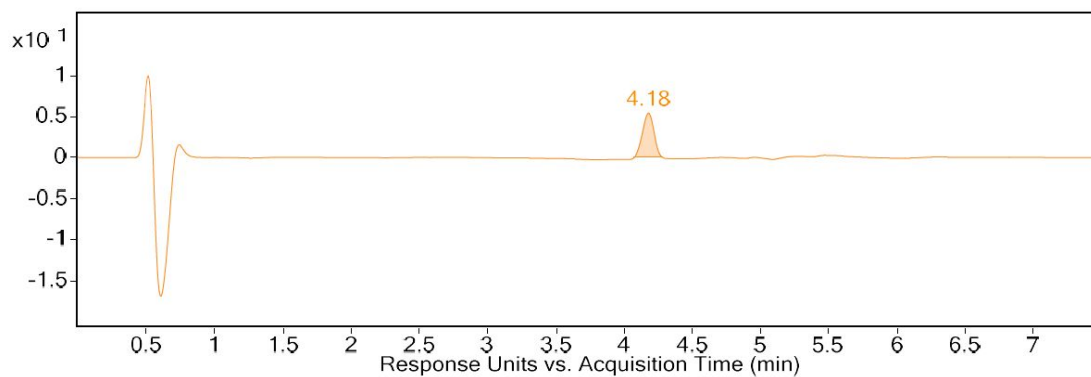

**Integration Peak List**

| Peak | Start | RT   | End  | Height | Area  | Area % |
|------|-------|------|------|--------|-------|--------|
| 1    | 4.07  | 4.18 | 4.28 | 5.4    | 31.07 | 100    |
